# Supplementary material for: Single step aqueous synthesis of pure rare earth nanoparticles in biocompatible polymer matrices
Source: Royal Society of Chemistry journal article supplement (doi:10.1039/c2jm30971h), 2012-01-01
Supplement: c2jm30971h.pdf [file c2jm30971h.pdf]

## Supplementary Information

### **Single Step Aqueous Synthesis of Pure Rare Earth Nanoparticles in Biocompatible Polymer Matrices**

*Sayantani Chall,<sup>a</sup> Abhijit Saha<sup>b</sup>, Sampad K. Biswas<sup>c</sup> Aparna Datta<sup>b</sup> and  
Subhash Chandra Bhattacharya<sup>\*a</sup>*

<sup>a</sup>Department of Chemistry, Jadavpur University, Kolkata 700032, India.

\*e-mail: sbjuchem@yahoo.com, scbhattacharyya@chemistry.jdvu.ac.in

Phone No: 033 2414 6223 / Fax: 91(033) 24146584

<sup>b</sup>UGC - DAE Consortium for Scientific Research, Kolkata Centre,  
111/LB-8, Bidhanagar, Kolkata 700098, India

<sup>c</sup>Non-Oxide Ceramic and Composite Division, Central Glass and Ceramic  
Research Institute, Council of Scientific and Industrial Research, Kolkata  
700032, India

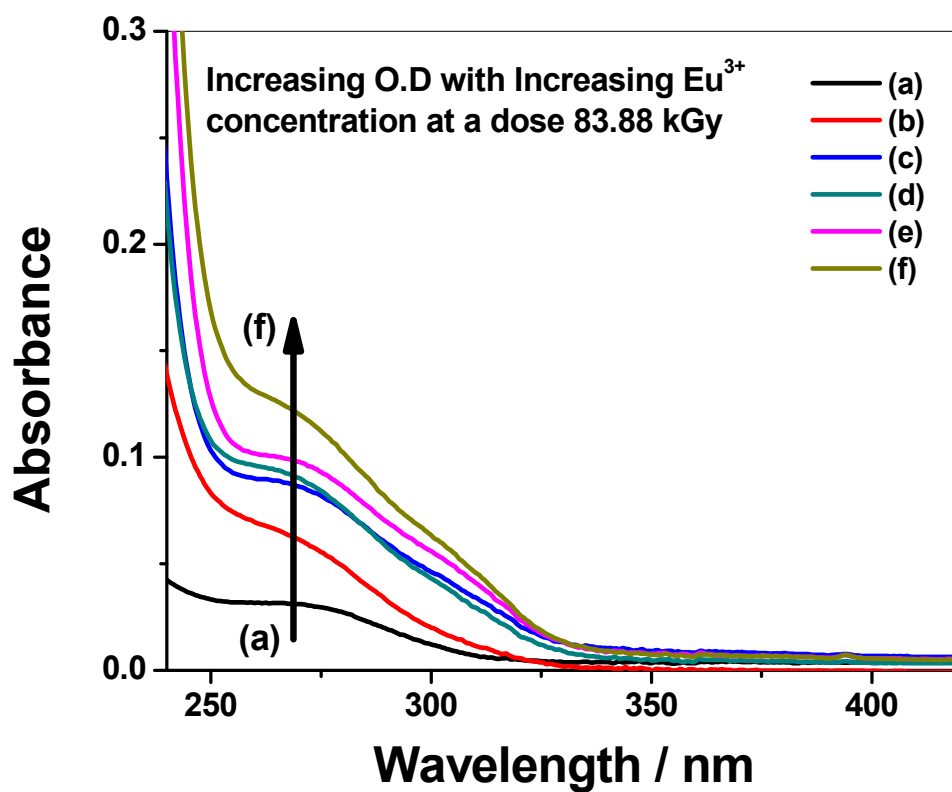

**Figure S1.** Variation of the absorbance of Eu<sup>0</sup> MNPs synthesized at different concentration of precursor Eu<sup>3+</sup> ions; [Eu<sup>3+</sup>] = (a)  $0.1 \times 10^{-3}$  mol dm<sup>-3</sup>, (b)  $1.0 \times 10^{-3}$  mol dm<sup>-3</sup>, (c)  $4.0 \times 10^{-3}$  mol dm<sup>-3</sup>, (d)  $5.0 \times 10^{-3}$  mol dm<sup>-3</sup>, (e)  $8.0 \times 10^{-3}$  mol dm<sup>-3</sup>, (f)  $10.0 \times 10^{-3}$  mol dm<sup>-3</sup>;  $\gamma$ -dose rate is 4.66 kGy h<sup>-1</sup>; [PVA]= 1.0%, [2-propanol]= 0.6 mol dm<sup>-3</sup>.

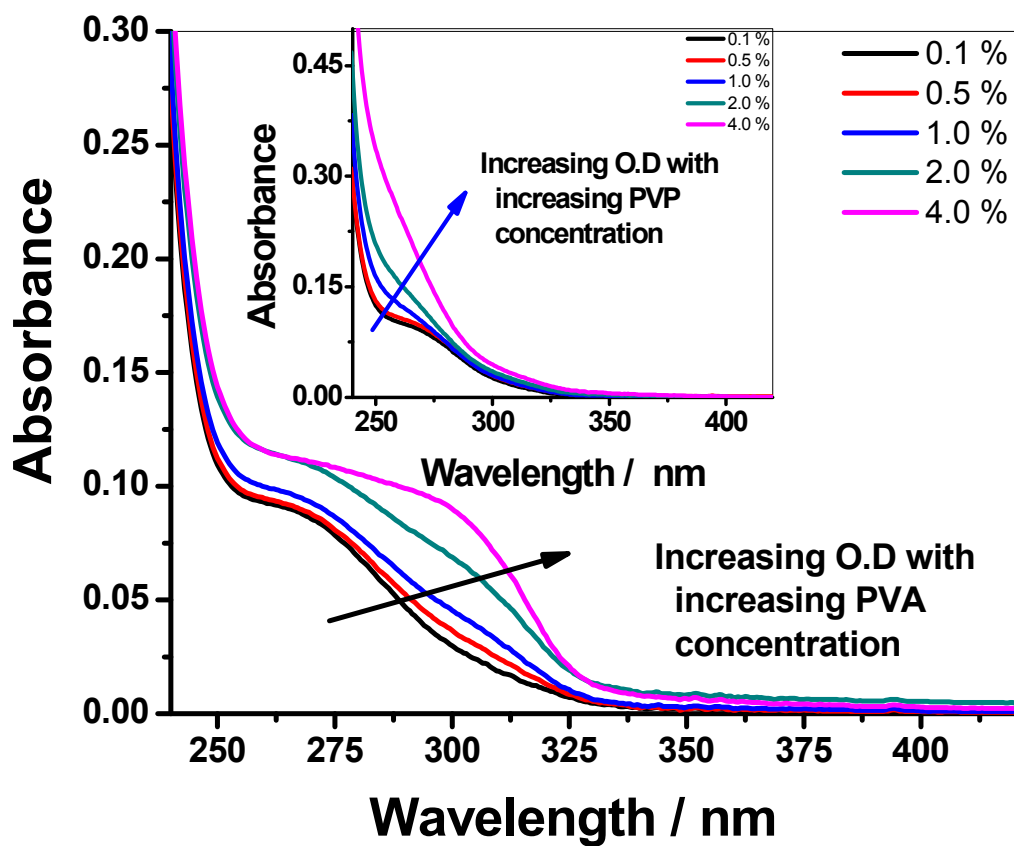

**Figure S2.** Variation of the absorbance of Eu<sup>0</sup> MNPs synthesized at different concentration of stabilising polymers, PVA and PVP (inset figure); [PVA] or [PVP]= 0.1%, 0.5%, 1.0%, 2.0%, 4.0%; [Eu<sup>3+</sup>] =  $5 \times 10^{-3}$  mol dm<sup>-3</sup>;  $\gamma$ -dose rate is 4.66 kGy h<sup>-1</sup>; [2-propanol]= 0.6 mol dm<sup>-3</sup>.
